# Supplementary material for: Current Medical and Social Issues for Hospitalized Heart Failure Patients in Japan and Factors for Improving Their Outcomes ― Insights From the REAL-HF Registry ―
Source: PubMed Central journal article supplement — Circ Rep. 2020 Mar 14;2(4):226–34. doi: 10.1253/circrep.CR-20-0011 (PMC7921357; doi:10.1253/circrep.cr-20-0011), 2020-03-14
Supplement: circrep-2-226-s001.pdf [file circrep-2-226-s001.pdf]

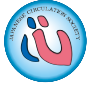

---

**Current Medical and Social Issues for Hospitalized  
Heart Failure Patients in Japan and Factors for  
Improving Their Outcomes**  
— Insights From the REAL-HF Registry —

---

Toshiro Kitagawa, MD, PhD; Takayuki Hidaka, MD, PhD; Makiko Naka;  
Susumu Nakayama; Kanako Yuge; Mitsuaki Isobe, MD, PhD;  
Yasuki Kihara, MD, PhD for the REAL-HF Investigators

## **REAL-HF Investigators**

Chair: Yasuki Kihara, Department of Cardiovascular Medicine, Hiroshima University Graduate School of Biomedical and Health Sciences, 1-2-3 Kasumi, Minami-Ku, Hiroshima 734-8551, Japan

Secretariat: Toshiro Kitagawa, Takayuki Hidaka, Makiko Naka, Ayano Michimura, Heart Failure Center, Hiroshima University Hospital, Hiroshima, Japan

Investigators: Noboru Oda, Department of Cardiology, Hiroshima City Asa Hospital, Hiroshima, Japan; Keiji Matsuda, Department of Cardiology, Chugoku Rosai Hospital, Kure, Japan; Nobuyuki Morishima, Department of Cardiology, Onomichi General Hospital, Onomichi, Japan; Yuji Yasunobu, Department of Cardiology, Miyoshi Medical Association Hospital, Miyoshi, Japan; Masaki Yoshikawa, Department of Cardiology, Fukuyama City Hospital, Fukuyama, Japan; Shuji Tsujiyama, Department of Cardiology, Hiroshima General Hospital, Hatsukaichi, Japan; and Yujiro Ono, Department of Cardiology, Higashihiroshima Medical Center, Higashihiroshima, Japan

**Supplementary Table 1. Patient Characteristics for the Propensity-Matched Cohort-1**

|                                              | <b>Introduction of outpatient cardiac rehabilitation</b> |                           | <b>P value</b> |
|----------------------------------------------|----------------------------------------------------------|---------------------------|----------------|
|                                              | <b>Presence<br/>(n=48)</b>                               | <b>Absence<br/>(n=48)</b> |                |
| <b>Age (years)</b>                           | 69±18                                                    | 68±15                     | 0.83           |
| <b>Male (%)</b>                              | 28 (58.3)                                                | 26 (54.2)                 | 0.68           |
| <b>Living circumstances (alone)</b>          | 11 (22.9)                                                | 10 (20.8)                 | 0.81           |
| <b>History of hospitalized HF (presence)</b> | 14 (29.2)                                                | 16 (33.3)                 | 0.66           |
| Underlying heart disease                     |                                                          |                           |                |
| Ischemic                                     | 14 (29.2)                                                | 12 (25.0)                 | 0.65           |
| Valvular                                     | 15 (31.3)                                                | 14 (29.2)                 | 0.82           |
| Hypertensive                                 | 8 (16.7)                                                 | 10 (20.8)                 | 0.60           |
| Other                                        | 20 (41.7)                                                | 21 (43.8)                 | 0.84           |
| <b>HF severity at admission</b>              |                                                          |                           | 0.71           |
| NYHA I                                       | 1 (2.1)                                                  | 0 (0.0)                   |                |
| NYHA II                                      | 12 (25.0)                                                | 10 (20.8)                 |                |
| NYHA III                                     | 16 (33.3)                                                | 16 (33.3)                 |                |
| NYHA IV                                      | 19 (39.6)                                                | 22 (45.8)                 |                |
| <b>Comorbidity</b>                           |                                                          |                           |                |
| Hypertension                                 | 29 (60.4)                                                | 29 (60.4)                 | 1.00           |
| Diabetes mellitus                            | 16 (33.3)                                                | 19 (39.6)                 | 0.52           |
| Dyslipidemia                                 | 14 (29.2)                                                | 14 (29.2)                 | 1.00           |
| Atrial fibrillation                          | 15 (31.3)                                                | 16 (33.3)                 | 0.83           |
| CKD                                          | 17 (35.4)                                                | 13 (27.1)                 | 0.38           |

|                                                                           |                 |                 |      |
|---------------------------------------------------------------------------|-----------------|-----------------|------|
| Obesity (BMI $\geq$ 28)                                                   | 8 (16.7)        | 13 (27.1)       | 0.22 |
| Smoking                                                                   | 15 (31.3)       | 18 (37.5)       | 0.52 |
| COPD                                                                      | 3 (6.3)         | 4 (8.3)         | 0.69 |
| <b>EF (%)</b>                                                             | 40.5 $\pm$ 17.1 | 44.7 $\pm$ 17.2 | 0.24 |
| <b>MMSE score</b>                                                         | 27 $\pm$ 3      | 27 $\pm$ 3      | 0.60 |
| <b>EQ5D score</b>                                                         | 0.77 $\pm$ 0.18 | 0.78 $\pm$ 0.23 | 0.98 |
| <b>Use of home nursing-care services<br/>(at 3-month after discharge)</b> | 14 (29.2)       | 13 (27.1)       | 0.82 |

Data expressed as mean  $\pm$  standard deviation or number (proportion, %).

CKD, chronic kidney disease; COPD, chronic obstructive pulmonary disease; EF, ejection fraction; EQ5D, EuroQol 5 dimensions; HF, heart failure; MMSE, Mini Mental State Examination; NYHA, New York Heart Association.

**Supplementary Table 2. Patient Characteristics for the Propensity-Matched Cohort 2**

|                                              | <b>Completion of outpatient cardiac rehabilitation</b> |                           | <b>P value</b> |
|----------------------------------------------|--------------------------------------------------------|---------------------------|----------------|
|                                              | <b>Presence<br/>(n=26)</b>                             | <b>Absence<br/>(n=26)</b> |                |
| <b>Age (years)</b>                           | 67±17                                                  | 67±18                     | 0.99           |
| <b>Male (%)</b>                              | 18 (69.2)                                              | 21 (80.8)                 | 0.34           |
| <b>Living circumstances (alone)</b>          | 5 (19.2)                                               | 5 (19.2)                  | 1.00           |
| <b>History of hospitalized HF (presence)</b> | 10 (38.5)                                              | 6 (23.1)                  | 0.23           |
| Underlying heart disease                     |                                                        |                           |                |
| Ischemic                                     | 5 (19.2)                                               | 6 (23.1)                  | 0.73           |
| Valvular                                     | 7 (26.9)                                               | 6 (23.1)                  | 0.75           |
| Hypertensive                                 | 3 (11.5)                                               | 3 (11.5)                  | 1.00           |
| Other                                        | 14 (53.9)                                              | 14 (53.9)                 | 1.00           |
| <b>HF severity at admission</b>              |                                                        |                           | 0.85           |
| NYHA I                                       | 1 (3.9)                                                | 2 (7.7)                   |                |
| NYHA II                                      | 6 (23.1)                                               | 4 (15.3)                  |                |
| NYHA III                                     | 9 (34.6)                                               | 10 (38.5)                 |                |
| NYHA IV                                      | 10 (38.5)                                              | 10 (38.5)                 |                |
| <b>Comorbidity</b>                           |                                                        |                           |                |
| Hypertension                                 | 13 (50.0)                                              | 16 (61.5)                 | 0.40           |
| Diabetes mellitus                            | 10 (38.5)                                              | 7 (26.9)                  | 0.38           |
| Dyslipidemia                                 | 10 (38.5)                                              | 11 (42.3)                 | 0.78           |
| Atrial fibrillation                          | 9 (34.6)                                               | 9 (34.6)                  | 1.00           |
| CKD                                          | 8 (30.8)                                               | 6 (23.1)                  | 0.53           |

|                                                                           |                 |                 |      |
|---------------------------------------------------------------------------|-----------------|-----------------|------|
| Obesity (BMI $\geq$ 28)                                                   | 3 (11.5)        | 4 (15.4)        | 0.68 |
| Smoking                                                                   | 10 (38.5)       | 10 (38.5)       | 1.00 |
| COPD                                                                      | 2 (7.7)         | 0 (0.0)         | 0.15 |
| <b>EF (%)</b>                                                             | 38.4 $\pm$ 16.2 | 41.9 $\pm$ 14.2 | 0.41 |
| <b>MMSE score</b>                                                         | 28 $\pm$ 3      | 28 $\pm$ 2      | 0.92 |
| <b>EQ5D score</b>                                                         | 0.76 $\pm$ 0.18 | 0.68 $\pm$ 0.26 | 0.42 |
| <b>Use of home nursing-care services<br/>(at 3-month after discharge)</b> | 6 (23.1)        | 6 (23.1)        | 1.00 |

Data expressed as mean  $\pm$  standard deviation or number (proportion, %).

CKD, chronic kidney disease; COPD, chronic obstructive pulmonary disease; EF, ejection fraction; EQ5D, EuroQol 5 dimensions; HF, heart failure; MMSE, Mini Mental State Examination; NYHA, New York Heart Association.
